# Supplementary material for: Dose-Response Associations of Lipid Traits With Coronary Artery Disease and Mortality
Source: PubMed Central journal article supplement (PMC10799266; doi:10.1001/jamanetworkopen.2023.52572), 2024-01-19
Supplement: jamanetwopen-e2352572-s001.pdf [file jamanetwopen-e2352572-s001.pdf]

## Supplemental Online Content

Yang G, Mason AM, Wood AM, Schooling CM, Burgess S. Dose-responses associations of lipid traits with coronary artery disease and mortality: a linear and nonlinear mendelian randomization study. *JAMA Network Open*. 2024;7(1):e2352572. doi:10.1001/jamanetworkopen.2023.52572

**eTable 1.** *International Statistical Classification of Diseases and Related Health Problems, Tenth Revision (ICD-10) Codes for Cause-Specific Mortality Outcomes*

**eTable 2.** Mendelian Randomization Estimates Using the Ratio Method for Genetically-Predicted apoB, LDL-C, and TG on Possible Confounders

**eTable 3.** Univariable Mendelian Randomization Estimates for Genetically-Predicted ApoB, LDL-C, and TG on CAD, All-Cause Mortality, and Cause-Specific Mortality

**eTable 4.** Multivariable Mendelian Randomization Estimates for Genetically-Predicted ApoB, LDL-C, and TG on CAD, All-Cause Mortality, and Cause-Specific Mortality Controlling for Other Lipid Traits and Possible Confounders

**eTable 5.** Univariable Mendelian Randomization Estimates for Genetically-Predicted ApoB, LDL-C, and TG on Parental All-Cause Mortality

**eTable 6.** Multivariable Mendelian Randomization Estimates for Genetically-Predicted ApoB, LDL-C, and TG on Parental All-Cause Mortality Controlling for Other Lipid Traits and Possible Confounders

**eFigure 1.** Shapes of the Associations of Genetically-Predicted ApoB, LDL-C, and TG With CAD, All-Cause Mortality, and Cause-Specific Mortality Overall

**eTable 7.** Stratum-Specific Mendelian Randomization Estimates for Genetically-Predicted ApoB on CAD, All-Cause Mortality, and Cause-Specific Mortality

**eTable 8.** Stratum-Specific Mendelian Randomization Estimates for Genetically-Predicted LDL-C on CAD, All-Cause Mortality, and Cause-Specific Mortality

**eTable 9.** Stratum-Specific Mendelian Randomization Estimates for Genetically-Predicted TG on CAD, All-Cause Mortality, and Cause-Specific Mortality

**eFigure 2.** Shapes of the Associations of Genetically-Predicted ApoB, LDL-C, and TG With CAD, All-Cause Mortality, and Cause-Specific Mortality for Males

**eFigure 3.** Shapes of the Associations of Genetically-Predicted ApoB, LDL-C, and TG With CAD, All-Cause Mortality, and Cause-Specific Mortality for Females

**eFigure 4.** Shapes of the Associations of Genetically-Predicted ApoB, LDL-C, and TG With CAD, All-Cause Mortality, and Cause-Specific Mortality for Younger People

**eFigure 5.** Shapes of the Associations of Genetically-Predicted ApoB, LDL-C, and TG With CAD, All-Cause Mortality, and Cause-Specific Mortality for Older People

This supplemental material has been provided by the authors to give readers additional information about their work.

**eTable 1. International Statistical Classification of Diseases and Related Health Problems, Tenth Revision (ICD-10) Codes for Cause-Specific Mortality Outcomes**

| Cause-specific mortality | ICD-10 codes                                                                                                                                                                                                                                                 |
|--------------------------|--------------------------------------------------------------------------------------------------------------------------------------------------------------------------------------------------------------------------------------------------------------|
| CVD                      | G45, I01, I03-I82, I87, I95-I99, F01, Q20-Q28, R96                                                                                                                                                                                                           |
| Cancer                   | C00-C97, D00-D48                                                                                                                                                                                                                                             |
| Non-CVD/cancer           | A00-A99, B00-B99, D50-D99, E00-E99, F00, F02-F99, G00-G44, G46-G99, H00-H99, I00, I02, I83-I86, I88-I89, J00-J99, K00-K99, L00-L99, M00-M99, N00-N99, O00-O99, P00-P99, Q00-Q18, Q30-Q99, S00-S99, T00-T99, U04, V00-V99, W00-W99, X00-X99, Y00-Y99, Z00-Z99 |

CVD, cardiovascular disease; ICD, International Classification of Diseases.

**eTable 2. Mendelian Randomization Estimates Using the Ratio Method for Genetically-Predicted ApoB, LDL-C, and TG on Possible Confounders**

| Exposure | Outcome                    | Measure    | Estimates               | P value |
|----------|----------------------------|------------|-------------------------|---------|
| ApoB     | Townsend deprivation index | Beta       | -0.04 (-0.07 to -0.005) | 0.025   |
|          | MET score                  | Beta       | 4.31 (-30.12 to 38.73)  | 0.806   |
|          | Current smoking            | Odds ratio | 0.95 (0.91 to 0.98)     | 0.005   |
|          | Current alcohol drinking   | Odds ratio | 0.98 (0.94 to 1.03)     | 0.390   |
| LDL-C    | Townsend deprivation index | Beta       | -0.04 (-0.08 to 0.001)  | 0.057   |
|          | MET score                  | Beta       | 25.77 (-15.28 to 66.83) | 0.219   |
|          | Current smoking            | Odds ratio | 0.93 (0.89 to 0.97)     | 0.002   |
|          | Current alcohol drinking   | Odds ratio | 0.97 (0.92 to 1.02)     | 0.247   |
| TG       | Townsend deprivation index | Beta       | 0.05 (0.01 to 0.08)     | 0.013   |
|          | MET score                  | Beta       | 28.04 (-9.54 to 65.62)  | 0.144   |
|          | Current smoking            | Odds ratio | 1.01 (0.97 to 1.05)     | 0.617   |
|          | Current alcohol drinking   | Odds ratio | 0.92 (0.87 to 0.96)     | 0.001   |

ApoB, apolipoprotein B; LDL-C, low-density lipoprotein cholesterol; MET, metabolic equivalent task; TG, triglycerides. Estimates are expressed as beta/odds ratio (95% confidence interval) per standard deviation increase in each lipid trait (approximately 0.24 g/L for apoB, 0.86 mmol/L for LDL-C, and 0.99 mmol/L for TG).

**eTable 3. Univariable Mendelian Randomization Estimates for Genetically-Predicted ApoB, LDL-C, and TG on CAD, All-Cause Mortality, and Cause-Specific Mortality**

| Exposure | Outcome                  | Method          | Odds ratio/<br>Hazard ratio | P value | P value<br>(Egger<br>intercept) |
|----------|--------------------------|-----------------|-----------------------------|---------|---------------------------------|
| ApoB     | CAD                      | IVW             | 1.66 (1.46 to 1.87)         | <0.001  | 0.423                           |
|          | CAD                      | Weighted median | 1.57 (1.42 to 1.74)         | <0.001  |                                 |
|          | CAD                      | MR Egger        | 1.74 (1.46 to 2.06)         | <0.001  |                                 |
|          | CAD                      | Conmix          | 1.87 (1.68 to 2.01)         | <0.001  |                                 |
|          | All-cause mortality      | IVW             | 1.11 (1.05 to 1.17)         | <0.001  | 0.869                           |
|          | All-cause mortality      | Weighted median | 1.08 (1.00 to 1.17)         | 0.050   |                                 |
|          | All-cause mortality      | MR Egger        | 1.12 (1.04 to 1.20)         | 0.004   |                                 |
|          | All-cause mortality      | Conmix          | 1.09 (1.04 to 1.14)         | 0.010   |                                 |
|          | CVD mortality            | IVW             | 1.37 (1.20 to 1.55)         | <0.001  | 0.066                           |
|          | CVD mortality            | Weighted median | 1.43 (1.22 to 1.69)         | <0.001  |                                 |
|          | CVD mortality            | MR Egger        | 1.54 (1.28 to 1.84)         | <0.001  |                                 |
|          | CVD mortality            | Conmix          | 1.40 (1.25 to 1.59)         | <0.001  |                                 |
|          | Cancer mortality         | IVW             | 1.03 (0.96 to 1.10)         | 0.458   | 0.035                           |
|          | Cancer mortality         | Weighted median | 0.99 (0.90 to 1.09)         | 0.848   |                                 |
|          | Cancer mortality         | MR Egger        | 0.96 (0.87 to 1.05)         | 0.364   |                                 |
|          | Cancer mortality         | Conmix          | 1.02 (0.92 to 1.08)         | 0.746   |                                 |
|          | Non-CVD/cancer mortality | IVW             | 1.10 (0.99 to 1.21)         | 0.069   | 0.111                           |
|          | Non-CVD/cancer mortality | Weighted median | 1.00 (0.87 to 1.15)         | 0.991   |                                 |
|          | Non-CVD/cancer mortality | MR Egger        | 1.19 (1.03 to 1.36)         | 0.016   |                                 |
|          | Non-CVD/cancer mortality | Conmix          | 1.01 (0.91 to 1.12)         | 0.772   |                                 |
| LDL-C    | CAD                      | IVW             | 1.73 (1.55 to 1.93)         | <0.001  | 0.271                           |
|          | CAD                      | Weighted median | 1.53 (1.38 to 1.71)         | <0.001  |                                 |
|          | CAD                      | MR Egger        | 1.83 (1.57 to 2.12)         | <0.001  |                                 |
|          | CAD                      | Conmix          | 1.71 (1.61 to 1.83)         | <0.001  |                                 |
|          | All-cause mortality      | IVW             | 1.15 (1.08 to 1.21)         | <0.001  | 0.973                           |
|          | All-cause mortality      | Weighted median | 1.11 (1.01 to 1.22)         | 0.031   |                                 |
|          | All-cause mortality      | MR Egger        | 1.15 (1.06 to 1.24)         | 0.001   |                                 |
|          | All-cause mortality      | Conmix          | 1.13 (1.05 to 1.20)         | <0.001  |                                 |
|          | CVD mortality            | IVW             | 1.47 (1.29 to 1.67)         | <0.001  | 0.332                           |
|          | CVD mortality            | Weighted median | 1.61 (1.31 to 1.97)         | <0.001  |                                 |
|          | CVD mortality            | MR Egger        | 1.56 (1.31 to 1.86)         | <0.001  |                                 |
|          | CVD mortality            | Conmix          | 1.45 (1.28 to 1.63)         | <0.001  |                                 |
|          | Cancer mortality         | IVW             | 1.04 (0.96 to 1.12)         | 0.301   | 0.203                           |
|          | Cancer mortality         | Weighted median | 0.99 (0.89 to 1.12)         | 0.926   |                                 |
|          | Cancer mortality         | MR Egger        | 1.00 (0.90 to 1.10)         | 0.941   |                                 |
|          | Cancer mortality         | Conmix          | 1.02 (0.95 to 1.10)         | 0.527   |                                 |
|          | Non-CVD/cancer mortality | IVW             | 1.15 (1.03 to 1.29)         | 0.015   | 0.471                           |
|          | Non-CVD/cancer mortality | Weighted median | 1.08 (0.92 to 1.28)         | 0.357   |                                 |
|          | Non-CVD/cancer mortality | MR Egger        | 1.19 (1.03 to 1.38)         | 0.022   |                                 |

|                          |                          |                     |                     |        |        |
|--------------------------|--------------------------|---------------------|---------------------|--------|--------|
|                          | Non-CVD/cancer mortality | Conmix              | 1.08 (0.97 to 1.20) | 0.114  |        |
| TG                       | CAD                      | IVW                 | 1.59 (1.47 to 1.73) | <0.001 |        |
|                          | CAD                      | Weighted median     | 1.49 (1.35 to 1.64) | <0.001 |        |
|                          | CAD                      | MR Egger            | 1.37 (1.23 to 1.53) | <0.001 | <0.001 |
|                          | CAD                      | Conmix              | 1.65 (1.51 to 1.81) | <0.001 |        |
|                          | All-cause mortality      | IVW                 | 1.07 (1.01 to 1.13) | 0.015  |        |
|                          | All-cause mortality      | Weighted median     | 1.00 (0.92 to 1.09) | 0.973  |        |
|                          | All-cause mortality      | MR Egger            | 1.03 (0.95 to 1.11) | 0.512  | 0.144  |
|                          | All-cause mortality      | Conmix              | 1.06 (1.00 to 1.10) | 0.031  |        |
|                          | CVD mortality            | IVW                 | 1.19 (1.06 to 1.34) | 0.003  |        |
|                          | CVD mortality            | Weighted median     | 1.14 (0.95 to 1.37) | 0.156  |        |
|                          | CVD mortality            | MR Egger            | 1.08 (0.91 to 1.27) | 0.376  | 0.104  |
|                          | CVD mortality            | Conmix              | 1.20 (1.07 to 1.34) | <0.001 |        |
|                          | Cancer mortality         | IVW                 | 1.02 (0.95 to 1.10) | 0.559  |        |
|                          | Cancer mortality         | Weighted median     | 0.99 (0.88 to 1.10) | 0.820  |        |
|                          | Cancer mortality         | MR Egger            | 0.99 (0.89 to 1.09) | 0.775  | 0.332  |
|                          | Cancer mortality         | Conmix              | 1.02 (0.96 to 1.08) | 0.716  |        |
|                          | Non-CVD/cancer mortality | IVW                 | 1.09 (0.99 to 1.22) | 0.089  |        |
|                          | Non-CVD/cancer mortality | Weighted median     | 0.93 (0.80 to 1.10) | 0.405  |        |
| Non-CVD/cancer mortality | MR Egger                 | 1.08 (0.93 to 1.25) | 0.318               | 0.790  |        |
| Non-CVD/cancer mortality | Conmix                   | 1.02 (0.93 to 1.12) | 0.608               |        |        |

ApoB, apolipoprotein B; CAD, coronary artery disease; Conmix, contamination mixture method; CVD, cardiovascular disease; IVW, inverse-variance weighted; LDL-C, low-density lipoprotein cholesterol; TG, triglycerides. Estimates are expressed as odds ratio (95% confidence interval) for CAD, or hazard ratio (95% confidence interval) for mortality outcomes per standard deviation increase in each lipid trait (approximately 0.24 g/L for apoB, 0.86 mmol/L for LDL-C, and 0.99 mmol/L for TG).

**eTable 4. Multivariable Mendelian Randomization Estimates for Genetically-Predicted ApoB, LDL-C, and TG on CAD, All-Cause Mortality, and Cause-Specific Mortality Controlling for Other Lipid Traits and Possible Confounders**

| Exposure | Adjusted for   | Outcome                  | Method   | Odds ratio/Hazard ratio | P value | P value (Egger intercept) |
|----------|----------------|--------------------------|----------|-------------------------|---------|---------------------------|
| ApoB     | TG             | CAD                      | IVW      | 1.58 (1.43 to 1.75)     | <0.001  |                           |
| ApoB     | TG             | CAD                      | MR Egger | 1.55 (1.39 to 1.74)     | <0.001  | 0.478                     |
| ApoB     | TG and smoking | CAD                      | IVW      | 1.60 (1.45 to 1.76)     | <0.001  |                           |
| ApoB     | TG and smoking | CAD                      | MR Egger | 1.57 (1.41 to 1.76)     | <0.001  | 0.565                     |
| ApoB     | TG             | All-cause mortality      | IVW      | 1.13 (1.06 to 1.20)     | <0.001  |                           |
| ApoB     | TG             | All-cause mortality      | MR Egger | 1.11 (1.04 to 1.19)     | 0.002   | 0.199                     |
| ApoB     | TG and smoking | All-cause mortality      | IVW      | 1.14 (1.08 to 1.21)     | <0.001  |                           |
| ApoB     | TG and smoking | All-cause mortality      | MR Egger | 1.13 (1.05 to 1.20)     | <0.001  | 0.288                     |
| ApoB     | TG             | CVD mortality            | IVW      | 1.40 (1.23 to 1.59)     | <0.001  |                           |
| ApoB     | TG             | CVD mortality            | MR Egger | 1.39 (1.21 to 1.61)     | <0.001  | 0.872                     |
| ApoB     | TG and smoking | CVD mortality            | IVW      | 1.40 (1.23 to 1.59)     | <0.001  |                           |
| ApoB     | TG and smoking | CVD mortality            | MR Egger | 1.39 (1.21 to 1.61)     | <0.001  | 0.882                     |
| ApoB     | TG             | Cancer mortality         | IVW      | 1.05 (0.97 to 1.13)     | 0.260   |                           |
| ApoB     | TG             | Cancer mortality         | MR Egger | 1.02 (0.93 to 1.11)     | 0.735   | 0.118                     |
| ApoB     | TG and smoking | Cancer mortality         | IVW      | 1.06 (0.98 to 1.14)     | 0.159   |                           |
| ApoB     | TG and smoking | Cancer mortality         | MR Egger | 1.03 (0.94 to 1.12)     | 0.510   | 0.163                     |
| ApoB     | TG             | Non-CVD/cancer mortality | IVW      | 1.12 (1.00 to 1.25)     | 0.046   |                           |
| ApoB     | TG             | Non-CVD/cancer mortality | MR Egger | 1.11 (0.98 to 1.26)     | 0.090   | 0.812                     |
| ApoB     | TG and smoking | Non-CVD/cancer mortality | IVW      | 1.14 (1.02 to 1.27)     | 0.020   |                           |
| ApoB     | TG and smoking | Non-CVD/cancer mortality | MR Egger | 1.14 (1.01 to 1.29)     | 0.037   | 0.979                     |
| LDL-C    | TG             | CAD                      | IVW      | 1.64 (1.46 to 1.84)     | <0.001  |                           |
| LDL-C    | TG             | CAD                      | MR Egger | 1.75 (1.53 to 2.00)     | <0.001  | 0.082                     |
| LDL-C    | TG and smoking | CAD                      | IVW      | 1.65 (1.47 to 1.85)     | <0.001  |                           |
| LDL-C    | TG and smoking | CAD                      | MR Egger | 1.77 (1.54 to 2.03)     | <0.001  | 0.068                     |
| LDL-C    | TG             | All-cause mortality      | IVW      | 1.15 (1.08 to 1.22)     | <0.001  |                           |

|       |                           |                          |          |                     |        |       |
|-------|---------------------------|--------------------------|----------|---------------------|--------|-------|
| LDL-C | TG                        | All-cause mortality      | MR Egger | 1.14 (1.06 to 1.23) | 0.001  | 0.759 |
| LDL-C | TG and smoking            | All-cause mortality      | IVW      | 1.16 (1.09 to 1.23) | <0.001 |       |
| LDL-C | TG and smoking            | All-cause mortality      | MR Egger | 1.16 (1.07 to 1.25) | <0.001 | 0.887 |
| LDL-C | TG                        | CVD mortality            | IVW      | 1.44 (1.26 to 1.66) | <0.001 |       |
| LDL-C | TG                        | CVD mortality            | MR Egger | 1.51 (1.28 to 1.78) | <0.001 | 0.301 |
| LDL-C | TG and smoking            | CVD mortality            | IVW      | 1.45 (1.26 to 1.66) | <0.001 |       |
| LDL-C | TG and smoking            | CVD mortality            | MR Egger | 1.52 (1.29 to 1.79) | <0.001 | 0.295 |
| LDL-C | TG                        | Cancer mortality         | IVW      | 1.04 (0.96 to 1.13) | 0.316  |       |
| LDL-C | TG                        | Cancer mortality         | MR Egger | 1.01 (0.91 to 1.11) | 0.888  | 0.193 |
| LDL-C | TG and smoking            | Cancer mortality         | IVW      | 1.05 (0.97 to 1.14) | 0.224  |       |
| LDL-C | TG and smoking            | Cancer mortality         | MR Egger | 1.02 (0.92 to 1.12) | 0.706  | 0.234 |
| LDL-C | TG                        | Non-CVD/cancer mortality | IVW      | 1.17 (1.04 to 1.33) | 0.010  |       |
| LDL-C | TG                        | Non-CVD/cancer mortality | MR Egger | 1.18 (1.02 to 1.37) | 0.025  | 0.870 |
| LDL-C | TG and smoking            | Non-CVD/cancer mortality | IVW      | 1.19 (1.05 to 1.35) | 0.005  |       |
| LDL-C | TG and smoking            | Non-CVD/cancer mortality | MR Egger | 1.21 (1.04 to 1.39) | 0.012  | 0.765 |
| TG    | ApoB                      | CAD                      | IVW      | 1.28 (1.16 to 1.41) | <0.001 |       |
| TG    | ApoB                      | CAD                      | MR Egger | 1.12 (0.98 to 1.27) | 0.088  | 0.002 |
| TG    | ApoB and alcohol drinking | CAD                      | IVW      | 1.26 (1.15 to 1.39) | <0.001 |       |
| TG    | ApoB and alcohol drinking | CAD                      | MR Egger | 1.13 (1.00 to 1.29) | 0.059  | 0.011 |
| TG    | ApoB                      | All-cause mortality      | IVW      | 0.99 (0.94 to 1.06) | 0.854  |       |
| TG    | ApoB                      | All-cause mortality      | MR Egger | 0.96 (0.88 to 1.04) | 0.275  | 0.148 |
| TG    | ApoB and alcohol drinking | All-cause mortality      | IVW      | 0.99 (0.93 to 1.05) | 0.726  |       |
| TG    | ApoB and alcohol drinking | All-cause mortality      | MR Egger | 0.96 (0.89 to 1.04) | 0.330  | 0.280 |
| TG    | ApoB                      | CVD mortality            | IVW      | 0.97 (0.86 to 1.11) | 0.690  |       |
| TG    | ApoB                      | CVD mortality            | MR Egger | 0.90 (0.76 to 1.07) | 0.243  | 0.188 |
| TG    | ApoB and alcohol drinking | CVD mortality            | IVW      | 0.97 (0.85 to 1.10) | 0.621  |       |
| TG    | ApoB and alcohol drinking | CVD mortality            | MR Egger | 0.91 (0.77 to 1.08) | 0.272  | 0.270 |
| TG    | ApoB                      | Cancer mortality         | IVW      | 1.01 (0.93 to 1.09) | 0.813  |       |
| TG    | ApoB                      | Cancer mortality         | MR Egger | 0.97 (0.87 to 1.07) | 0.538  | 0.228 |
| TG    | ApoB and alcohol drinking | Cancer mortality         | IVW      | 1.01 (0.93 to 1.09) | 0.836  |       |

|    |                           |                          |          |                     |       |       |
|----|---------------------------|--------------------------|----------|---------------------|-------|-------|
| TG | ApoB and alcohol drinking | Cancer mortality         | MR Egger | 0.97 (0.87 to 1.07) | 0.548 | 0.249 |
| TG | ApoB                      | Non-CVD/cancer mortality | IVW      | 0.99 (0.88 to 1.10) | 0.791 |       |
| TG | ApoB                      | Non-CVD/cancer mortality | MR Egger | 0.98 (0.84 to 1.13) | 0.760 | 0.871 |
| TG | ApoB and alcohol drinking | Non-CVD/cancer mortality | IVW      | 0.97 (0.87 to 1.09) | 0.631 |       |
| TG | ApoB and alcohol drinking | Non-CVD/cancer mortality | MR Egger | 0.99 (0.86 to 1.15) | 0.895 | 0.727 |

ApoB, apolipoprotein B; CAD, coronary artery disease; CVD, cardiovascular disease; IVW, inverse-variance weighted; LDL-C, low-density lipoprotein cholesterol; TG, triglycerides. Estimates are expressed as odds ratio (95% confidence interval) for CAD, or hazard ratio (95% confidence interval) for mortality outcomes per standard deviation increase in each lipid trait (approximately 0.24 g/L for apoB, 0.86 mmol/L for LDL-C, and 0.99 mmol/L for TG).



**eTable 5. Univariable Mendelian Randomization Estimates for Genetically-Predicted ApoB, LDL-C, and TG on Parental All-Cause Mortality**

| Exposure | Method          | Hazard ratio        | P value | P value (Egger intercept) |
|----------|-----------------|---------------------|---------|---------------------------|
| ApoB     | IVW             | 1.16 (1.12 to 1.21) | <0.001  |                           |
|          | Weighted median | 1.15 (1.10 to 1.19) | <0.001  |                           |
|          | MR Egger        | 1.21 (1.14 to 1.27) | <0.001  | 0.081                     |
|          | Conmix          | 1.17 (1.14 to 1.19) | <0.001  |                           |
| LDL-C    | IVW             | 1.18 (1.13 to 1.23) | <0.001  |                           |
|          | Weighted median | 1.15 (1.10 to 1.20) | <0.001  |                           |
|          | MR Egger        | 1.19 (1.13 to 1.26) | <0.001  | 0.494                     |
|          | Conmix          | 1.16 (1.12 to 1.19) | <0.001  |                           |
| TG       | IVW             | 1.14 (1.10 to 1.17) | <0.001  |                           |
|          | Weighted median | 1.11 (1.07 to 1.15) | <0.001  |                           |
|          | MR Egger        | 1.08 (1.03 to 1.13) | 0.001   | 0.003                     |
|          | Conmix          | 1.14 (1.12 to 1.16) | <0.001  |                           |

ApoB, apolipoprotein B; Conmix, contamination mixture method; IVW, inverse-variance weighted; LDL-C, low-density lipoprotein cholesterol; TG, triglycerides. Estimates are expressed as hazard ratio (95% confidence interval) per standard deviation increase in each lipid trait (approximately 0.24 g/L for apoB, 0.86 mmol/L for LDL-C, and 0.99 mmol/L for TG).

**eTable 6. Multivariable Mendelian Randomization Estimates for Genetically-Predicted ApoB, LDL-C, and TG on Parental All-Cause Mortality Controlling for Other Lipid Traits and Possible Confounders**

| Exposure | Adjusted for              | Method   | Hazard ratio        | P value | P value (Egger intercept) |
|----------|---------------------------|----------|---------------------|---------|---------------------------|
| ApoB     | TG                        | IVW      | 1.17 (1.12 to 1.21) | <0.001  |                           |
| ApoB     | TG                        | MR Egger | 1.17 (1.12 to 1.23) | <0.001  | 0.574                     |
| ApoB     | TG and smoking            | IVW      | 1.17 (1.13 to 1.22) | <0.001  |                           |
| ApoB     | TG and smoking            | MR Egger | 1.18 (1.13 to 1.23) | <0.001  | 0.434                     |
| LDL-C    | TG                        | IVW      | 1.16 (1.11 to 1.21) | <0.001  |                           |
| LDL-C    | TG                        | MR Egger | 1.19 (1.13 to 1.25) | <0.001  | 0.056                     |
| LDL-C    | TG and smoking            | IVW      | 1.16 (1.11 to 1.21) | <0.001  |                           |
| LDL-C    | TG and smoking            | MR Egger | 1.19 (1.14 to 1.25) | <0.001  | 0.042                     |
| TG       | ApoB                      | IVW      | 1.04 (1.00 to 1.08) | 0.038   |                           |
| TG       | ApoB                      | MR Egger | 0.99 (0.95 to 1.04) | 0.814   | 0.005                     |
| TG       | ApoB and alcohol drinking | IVW      | 1.03 (1.00 to 1.07) | 0.062   |                           |
| TG       | ApoB and alcohol drinking | MR Egger | 1.00 (0.95 to 1.05) | 0.933   | 0.020                     |

ApoB, apolipoprotein B; IVW, inverse-variance weighted; LDL-C, low-density lipoprotein cholesterol; TG, triglycerides. Estimates are expressed as hazard ratio (95% confidence interval) per standard deviation increase in each lipid trait (approximately 0.24 g/L for apoB, 0.86 mmol/L for LDL-C, and 0.99 mmol/L for TG).

**eFigure 1. Shapes of the Associations Of Genetically-Predicted ApoB, LDL-C, and TG With CAD, All-Cause Mortality, and Cause-Specific Mortality Overall**

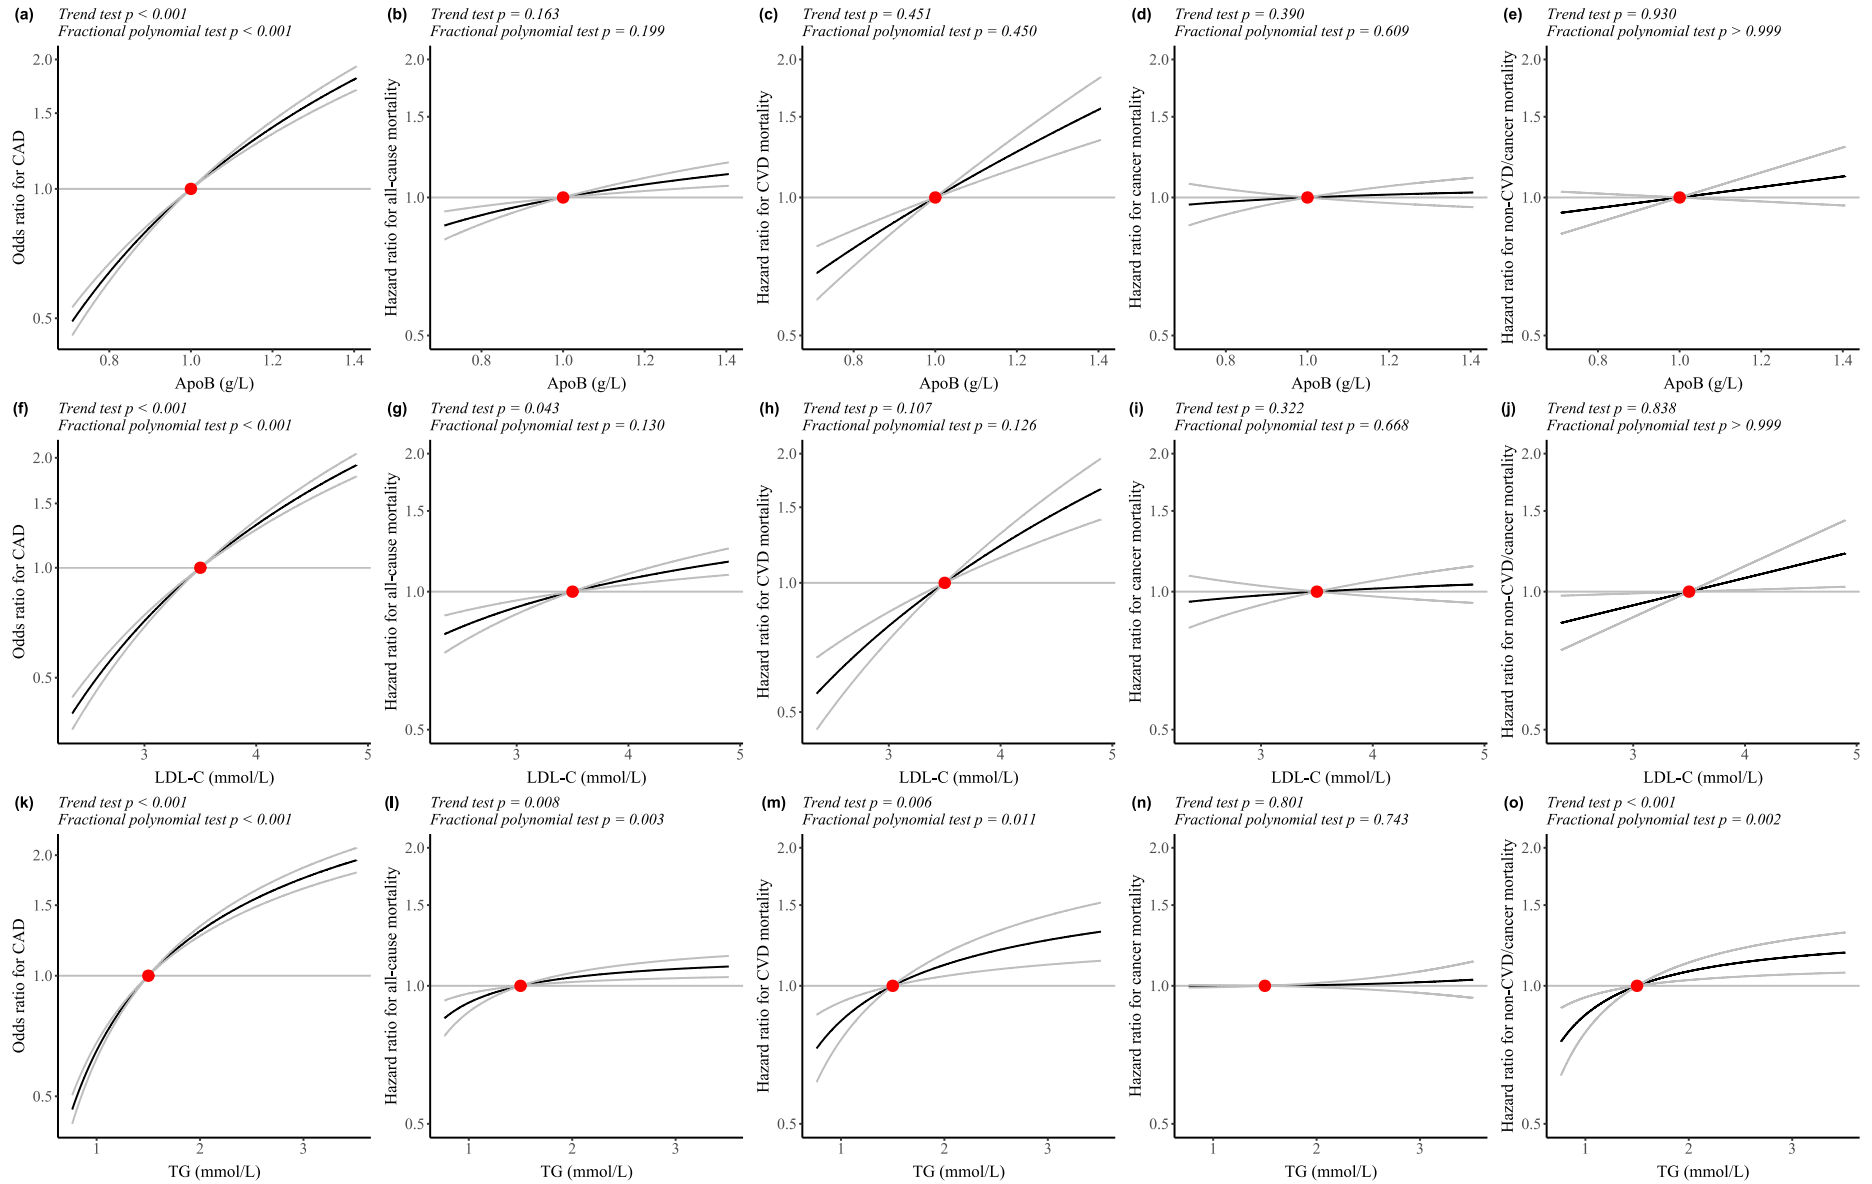

ApoB, apolipoprotein B; CAD, coronary artery disease; CVD, cardiovascular disease; LDL-C, low-density lipoprotein cholesterol; TG, triglycerides. The x-axis depicts apoB level in g/L, LDL-C level in mmol/L, or TG level in mmol/L. The y-axis depicts the odds ratio for CAD or hazard ratio for mortality outcomes with respect to the reference, plotted on a log scale. Reference is set to the median of each lipid trait (1.0 g/L for apoB, 3.5 mmol/L for LDL-C, and 1.5 mmol/L for TG). The black lines represent the dose-response relationship, and the grey lines represent the 95% confidence intervals. The trend test assesses whether a linear trend in the stratum-specific estimates exists, and the fractional polynomial test examines whether a non-linear model fits the exposure-outcome relationship better than a linear model.

**eTable 7. Stratum-Specific Mendelian Randomization Estimates for Genetically-Predicted ApoB on CAD, All-Cause Mortality, and Cause-Specific Mortality**

| Stratum | Mean apoB (g/L) | Outcome             | Odds ratio/Hazard ratio | P value |
|---------|-----------------|---------------------|-------------------------|---------|
| 1       | 0.71            | CAD                 | 1.96 (1.75 to 2.21)     | <0.001  |
| 2       | 0.81            | CAD                 | 2.29 (2.00 to 2.61)     | <0.001  |
| 3       | 0.88            | CAD                 | 1.96 (1.69 to 2.27)     | <0.001  |
| 4       | 0.94            | CAD                 | 1.69 (1.44 to 1.99)     | <0.001  |
| 5       | 1.00            | CAD                 | 1.44 (1.21 to 1.72)     | <0.001  |
| 6       | 1.05            | CAD                 | 1.36 (1.14 to 1.63)     | 0.001   |
| 7       | 1.11            | CAD                 | 1.32 (1.10 to 1.60)     | 0.003   |
| 8       | 1.18            | CAD                 | 1.44 (1.19 to 1.74)     | <0.001  |
| 9       | 1.26            | CAD                 | 1.46 (1.20 to 1.77)     | <0.001  |
| 10      | 1.41            | CAD                 | 1.20 (1.00 to 1.43)     | 0.047   |
| 1       | 0.71            | All-cause mortality | 1.17 (1.03 to 1.33)     | 0.013   |
| 2       | 0.81            | All-cause mortality | 1.10 (0.96 to 1.27)     | 0.150   |
| 3       | 0.88            | All-cause mortality | 1.16 (1.01 to 1.34)     | 0.038   |
| 4       | 0.94            | All-cause mortality | 1.11 (0.96 to 1.29)     | 0.152   |
| 5       | 1.00            | All-cause mortality | 0.97 (0.84 to 1.13)     | 0.712   |
| 6       | 1.05            | All-cause mortality | 1.06 (0.91 to 1.23)     | 0.450   |
| 7       | 1.11            | All-cause mortality | 1.12 (0.96 to 1.31)     | 0.151   |
| 8       | 1.18            | All-cause mortality | 1.29 (1.11 to 1.51)     | 0.001   |
| 9       | 1.26            | All-cause mortality | 1.01 (0.87 to 1.17)     | 0.935   |
| 10      | 1.41            | All-cause mortality | 1.01 (0.87 to 1.17)     | 0.897   |
| 1       | 0.71            | CVD mortality       | 1.28 (1.00 to 1.65)     | 0.054   |
| 2       | 0.81            | CVD mortality       | 1.65 (1.23 to 2.20)     | 0.001   |
| 3       | 0.88            | CVD mortality       | 1.45 (1.07 to 1.97)     | 0.018   |
| 4       | 0.94            | CVD mortality       | 1.71 (1.21 to 2.40)     | 0.002   |

|       |      |                          |                     |       |
|-------|------|--------------------------|---------------------|-------|
| 5     | 1.00 | CVD mortality            | 1.08 (0.77 to 1.51) | 0.659 |
| 6     | 1.05 | CVD mortality            | 1.36 (0.96 to 1.90) | 0.080 |
| 7     | 1.11 | CVD mortality            | 1.09 (0.76 to 1.56) | 0.648 |
| 8     | 1.18 | CVD mortality            | 1.46 (1.01 to 2.10) | 0.043 |
| 9     | 1.26 | CVD mortality            | 1.17 (0.83 to 1.64) | 0.362 |
| 10    | 1.41 | CVD mortality            | 1.35 (0.96 to 1.89) | 0.084 |
| <hr/> |      |                          |                     |       |
| 1     | 0.71 | Cancer mortality         | 1.08 (0.89 to 1.30) | 0.448 |
| 2     | 0.81 | Cancer mortality         | 0.97 (0.80 to 1.18) | 0.747 |
| 3     | 0.88 | Cancer mortality         | 1.16 (0.95 to 1.42) | 0.158 |
| 4     | 0.94 | Cancer mortality         | 0.96 (0.78 to 1.18) | 0.692 |
| 5     | 1.00 | Cancer mortality         | 0.98 (0.80 to 1.21) | 0.873 |
| 6     | 1.05 | Cancer mortality         | 0.98 (0.80 to 1.20) | 0.850 |
| 7     | 1.11 | Cancer mortality         | 1.07 (0.87 to 1.32) | 0.519 |
| 8     | 1.18 | Cancer mortality         | 1.21 (0.98 to 1.49) | 0.071 |
| 9     | 1.26 | Cancer mortality         | 0.91 (0.75 to 1.11) | 0.344 |
| 10    | 1.41 | Cancer mortality         | 0.96 (0.79 to 1.17) | 0.677 |
| <hr/> |      |                          |                     |       |
| 1     | 0.71 | Non-CVD/cancer mortality | 1.18 (0.94 to 1.48) | 0.145 |
| 2     | 0.81 | Non-CVD/cancer mortality | 0.99 (0.77 to 1.27) | 0.908 |
| 3     | 0.88 | Non-CVD/cancer mortality | 0.97 (0.74 to 1.27) | 0.822 |
| 4     | 0.94 | Non-CVD/cancer mortality | 1.07 (0.81 to 1.42) | 0.650 |
| 5     | 1.00 | Non-CVD/cancer mortality | 0.85 (0.64 to 1.12) | 0.244 |
| 6     | 1.05 | Non-CVD/cancer mortality | 1.00 (0.74 to 1.34) | 0.998 |
| 7     | 1.11 | Non-CVD/cancer mortality | 1.26 (0.93 to 1.72) | 0.135 |
| 8     | 1.18 | Non-CVD/cancer mortality | 1.39 (1.03 to 1.88) | 0.033 |
| 9     | 1.26 | Non-CVD/cancer mortality | 1.15 (0.83 to 1.57) | 0.402 |
| 10    | 1.41 | Non-CVD/cancer mortality | 0.91 (0.67 to 1.23) | 0.533 |

ApoB, apolipoprotein B; CAD, coronary artery disease; CVD, cardiovascular disease. Estimates are expressed as odds ratio (95% confidence interval) for CAD, or hazard ratio (95% confidence interval) for mortality outcomes per standard deviation increase in apoB (approximately 0.24 g/L).

**eTable 8. Stratum-Specific Mendelian Randomization Estimates for Genetically-Predicted LDL-C on CAD, All-Cause Mortality, and Cause-Specific Mortality**

| Stratum | Mean LDL-C (mmol/L) | Outcome             | Odds ratio/Hazard ratio | P value |
|---------|---------------------|---------------------|-------------------------|---------|
| 1       | 2.35                | CAD                 | 2.38 (2.11 to 2.69)     | <0.001  |
| 2       | 2.74                | CAD                 | 2.36 (2.04 to 2.73)     | <0.001  |
| 3       | 3.01                | CAD                 | 2.18 (1.84 to 2.59)     | <0.001  |
| 4       | 3.24                | CAD                 | 2.27 (1.87 to 2.75)     | <0.001  |
| 5       | 3.45                | CAD                 | 1.37 (1.12 to 1.69)     | 0.003   |
| 6       | 3.65                | CAD                 | 1.77 (1.42 to 2.21)     | <0.001  |
| 7       | 3.86                | CAD                 | 1.31 (1.04 to 1.66)     | 0.024   |
| 8       | 4.10                | CAD                 | 1.54 (1.22 to 1.94)     | <0.001  |
| 9       | 4.41                | CAD                 | 1.23 (0.97 to 1.55)     | 0.086   |
| 10      | 4.90                | CAD                 | 1.34 (1.08 to 1.67)     | 0.008   |
| 1       | 2.35                | All-cause mortality | 1.08 (0.95 to 1.24)     | 0.241   |
| 2       | 2.74                | All-cause mortality | 1.23 (1.05 to 1.43)     | 0.008   |
| 3       | 3.01                | All-cause mortality | 1.24 (1.05 to 1.47)     | 0.010   |
| 4       | 3.24                | All-cause mortality | 1.29 (1.08 to 1.53)     | 0.004   |
| 5       | 3.45                | All-cause mortality | 1.06 (0.89 to 1.27)     | 0.500   |
| 6       | 3.65                | All-cause mortality | 1.30 (1.09 to 1.56)     | 0.004   |
| 7       | 3.86                | All-cause mortality | 1.09 (0.91 to 1.31)     | 0.339   |
| 8       | 4.10                | All-cause mortality | 1.04 (0.87 to 1.25)     | 0.644   |
| 9       | 4.41                | All-cause mortality | 1.14 (0.95 to 1.38)     | 0.160   |
| 10      | 4.90                | All-cause mortality | 0.99 (0.83 to 1.17)     | 0.897   |
| 1       | 2.35                | CVD mortality       | 1.63 (1.24 to 2.12)     | <0.001  |
| 2       | 2.74                | CVD mortality       | 1.86 (1.36 to 2.56)     | <0.001  |
| 3       | 3.01                | CVD mortality       | 1.45 (1.01 to 2.09)     | 0.044   |
| 4       | 3.24                | CVD mortality       | 1.96 (1.32 to 2.89)     | 0.001   |
| 5       | 3.45                | CVD mortality       | 0.88 (0.59 to 1.31)     | 0.526   |
| 6       | 3.65                | CVD mortality       | 2.09 (1.38 to 3.15)     | <0.001  |

|    |      |                          |                     |       |
|----|------|--------------------------|---------------------|-------|
| 7  | 3.86 | CVD mortality            | 1.21 (0.80 to 1.82) | 0.371 |
| 8  | 4.10 | CVD mortality            | 1.36 (0.88 to 2.09) | 0.165 |
| 9  | 4.41 | CVD mortality            | 1.59 (1.01 to 2.50) | 0.044 |
| 10 | 4.90 | CVD mortality            | 1.15 (0.77 to 1.71) | 0.489 |
| 1  | 2.35 | Cancer mortality         | 0.85 (0.69 to 1.04) | 0.108 |
| 2  | 2.74 | Cancer mortality         | 1.10 (0.88 to 1.36) | 0.411 |
| 3  | 3.01 | Cancer mortality         | 1.17 (0.93 to 1.49) | 0.181 |
| 4  | 3.24 | Cancer mortality         | 1.17 (0.92 to 1.50) | 0.197 |
| 5  | 3.45 | Cancer mortality         | 1.21 (0.95 to 1.54) | 0.127 |
| 6  | 3.65 | Cancer mortality         | 1.03 (0.81 to 1.31) | 0.788 |
| 7  | 3.86 | Cancer mortality         | 1.02 (0.80 to 1.31) | 0.866 |
| 8  | 4.10 | Cancer mortality         | 0.96 (0.75 to 1.22) | 0.732 |
| 9  | 4.41 | Cancer mortality         | 0.98 (0.77 to 1.25) | 0.886 |
| 10 | 4.90 | Cancer mortality         | 0.96 (0.77 to 1.21) | 0.752 |
| 1  | 2.35 | Non-CVD/cancer mortality | 1.10 (0.87 to 1.40) | 0.428 |
| 2  | 2.74 | Non-CVD/cancer mortality | 1.04 (0.78 to 1.38) | 0.803 |
| 3  | 3.01 | Non-CVD/cancer mortality | 1.14 (0.83 to 1.56) | 0.410 |
| 4  | 3.24 | Non-CVD/cancer mortality | 1.15 (0.83 to 1.59) | 0.392 |
| 5  | 3.45 | Non-CVD/cancer mortality | 0.92 (0.66 to 1.29) | 0.636 |
| 6  | 3.65 | Non-CVD/cancer mortality | 1.56 (1.09 to 2.23) | 0.016 |
| 7  | 3.86 | Non-CVD/cancer mortality | 1.19 (0.83 to 1.72) | 0.342 |
| 8  | 4.10 | Non-CVD/cancer mortality | 1.03 (0.72 to 1.47) | 0.872 |
| 9  | 4.41 | Non-CVD/cancer mortality | 1.29 (0.89 to 1.88) | 0.185 |
| 10 | 4.90 | Non-CVD/cancer mortality | 0.98 (0.69 to 1.40) | 0.915 |

CAD, coronary artery disease; CVD, cardiovascular disease; LDL-C, low-density lipoprotein cholesterol. Estimates are expressed as odds ratio (95% confidence interval) for CAD, or hazard ratio (95% confidence interval) for mortality outcomes per standard deviation increase in LDL-C (approximately 0.86 mmol/L).



**eTable 9. Stratum-Specific Mendelian Randomization Estimates for Genetically-Predicted TG on CAD, All-Cause Mortality, and Cause-Specific Mortality**

| Stratum | Mean TG (mmol/L) | Outcome             | Odds ratio/Hazard ratio | P value |
|---------|------------------|---------------------|-------------------------|---------|
| 1       | 0.76             | CAD                 | 8.78 (6.17 to 12.50)    | <0.001  |
| 2       | 0.95             | CAD                 | 3.43 (2.51 to 4.70)     | <0.001  |
| 3       | 1.11             | CAD                 | 2.91 (2.16 to 3.92)     | <0.001  |
| 4       | 1.27             | CAD                 | 2.82 (2.12 to 3.75)     | <0.001  |
| 5       | 1.44             | CAD                 | 1.82 (1.38 to 2.40)     | <0.001  |
| 6       | 1.64             | CAD                 | 1.57 (1.20 to 2.04)     | 0.001   |
| 7       | 1.87             | CAD                 | 1.59 (1.22 to 2.06)     | <0.001  |
| 8       | 2.17             | CAD                 | 1.37 (1.07 to 1.76)     | 0.012   |
| 9       | 2.62             | CAD                 | 1.35 (1.05 to 1.73)     | 0.021   |
| 10      | 3.51             | CAD                 | 1.15 (0.91 to 1.45)     | 0.238   |
| 1       | 0.76             | All-cause mortality | 2.78 (2.05 to 3.75)     | <0.001  |
| 2       | 0.95             | All-cause mortality | 0.86 (0.65 to 1.13)     | 0.279   |
| 3       | 1.11             | All-cause mortality | 1.25 (0.96 to 1.64)     | 0.100   |
| 4       | 1.27             | All-cause mortality | 1.19 (0.92 to 1.55)     | 0.183   |
| 5       | 1.44             | All-cause mortality | 1.10 (0.85 to 1.42)     | 0.471   |
| 6       | 1.64             | All-cause mortality | 1.15 (0.90 to 1.47)     | 0.276   |
| 7       | 1.87             | All-cause mortality | 1.08 (0.84 to 1.40)     | 0.529   |
| 8       | 2.17             | All-cause mortality | 1.04 (0.82 to 1.31)     | 0.772   |
| 9       | 2.62             | All-cause mortality | 1.05 (0.82 to 1.34)     | 0.682   |
| 10      | 3.51             | All-cause mortality | 0.99 (0.79 to 1.24)     | 0.917   |
| 1       | 0.76             | CVD mortality       | 2.37 (1.18 to 4.75)     | 0.015   |
| 2       | 0.95             | CVD mortality       | 0.75 (0.40 to 1.42)     | 0.379   |
| 3       | 1.11             | CVD mortality       | 3.24 (1.75 to 6.02)     | <0.001  |
| 4       | 1.27             | CVD mortality       | 1.14 (0.64 to 2.02)     | 0.664   |
| 5       | 1.44             | CVD mortality       | 1.40 (0.79 to 2.47)     | 0.253   |
| 6       | 1.64             | CVD mortality       | 1.37 (0.79 to 2.37)     | 0.259   |

|    |      |                          |                     |        |
|----|------|--------------------------|---------------------|--------|
| 7  | 1.87 | CVD mortality            | 1.36 (0.79 to 2.34) | 0.262  |
| 8  | 2.17 | CVD mortality            | 1.04 (0.62 to 1.72) | 0.889  |
| 9  | 2.62 | CVD mortality            | 1.17 (0.69 to 2.00) | 0.561  |
| 10 | 3.51 | CVD mortality            | 1.00 (0.62 to 1.60) | 0.985  |
| 1  | 0.76 | Cancer mortality         | 2.56 (1.66 to 3.95) | <0.001 |
| 2  | 0.95 | Cancer mortality         | 0.56 (0.38 to 0.82) | 0.003  |
| 3  | 1.11 | Cancer mortality         | 1.02 (0.70 to 1.48) | 0.912  |
| 4  | 1.27 | Cancer mortality         | 1.05 (0.73 to 1.51) | 0.800  |
| 5  | 1.44 | Cancer mortality         | 1.02 (0.72 to 1.44) | 0.925  |
| 6  | 1.64 | Cancer mortality         | 1.10 (0.78 to 1.56) | 0.585  |
| 7  | 1.87 | Cancer mortality         | 1.00 (0.70 to 1.42) | 0.985  |
| 8  | 2.17 | Cancer mortality         | 1.02 (0.73 to 1.42) | 0.921  |
| 9  | 2.62 | Cancer mortality         | 0.97 (0.69 to 1.35) | 0.859  |
| 10 | 3.51 | Cancer mortality         | 1.04 (0.75 to 1.44) | 0.811  |
| 1  | 0.76 | Non-CVD/cancer mortality | 3.47 (2.03 to 5.93) | <0.001 |
| 2  | 0.95 | Non-CVD/cancer mortality | 2.17 (1.28 to 3.66) | 0.004  |
| 3  | 1.11 | Non-CVD/cancer mortality | 1.05 (0.62 to 1.76) | 0.860  |
| 4  | 1.27 | Non-CVD/cancer mortality | 1.58 (0.96 to 2.57) | 0.070  |
| 5  | 1.44 | Non-CVD/cancer mortality | 1.13 (0.69 to 1.87) | 0.627  |
| 6  | 1.64 | Non-CVD/cancer mortality | 1.08 (0.67 to 1.74) | 0.739  |
| 7  | 1.87 | Non-CVD/cancer mortality | 1.12 (0.68 to 1.84) | 0.662  |
| 8  | 2.17 | Non-CVD/cancer mortality | 1.06 (0.67 to 1.69) | 0.797  |
| 9  | 2.62 | Non-CVD/cancer mortality | 1.15 (0.71 to 1.87) | 0.574  |
| 10 | 3.51 | Non-CVD/cancer mortality | 0.88 (0.57 to 1.38) | 0.585  |

CAD, coronary artery disease; CVD, cardiovascular disease; TG, triglycerides. Estimates are expressed as odds ratio (95% confidence interval) for CAD, or hazard ratio (95% confidence interval) for mortality outcomes per standard deviation increase in TG (approximately 0.99 mmol/L).

**eFigure 2. Shapes of the Associations of Genetically-Predicted ApoB, LDL-C, and TG With CAD, All-Cause Mortality, and Cause-Specific Mortality for Males**

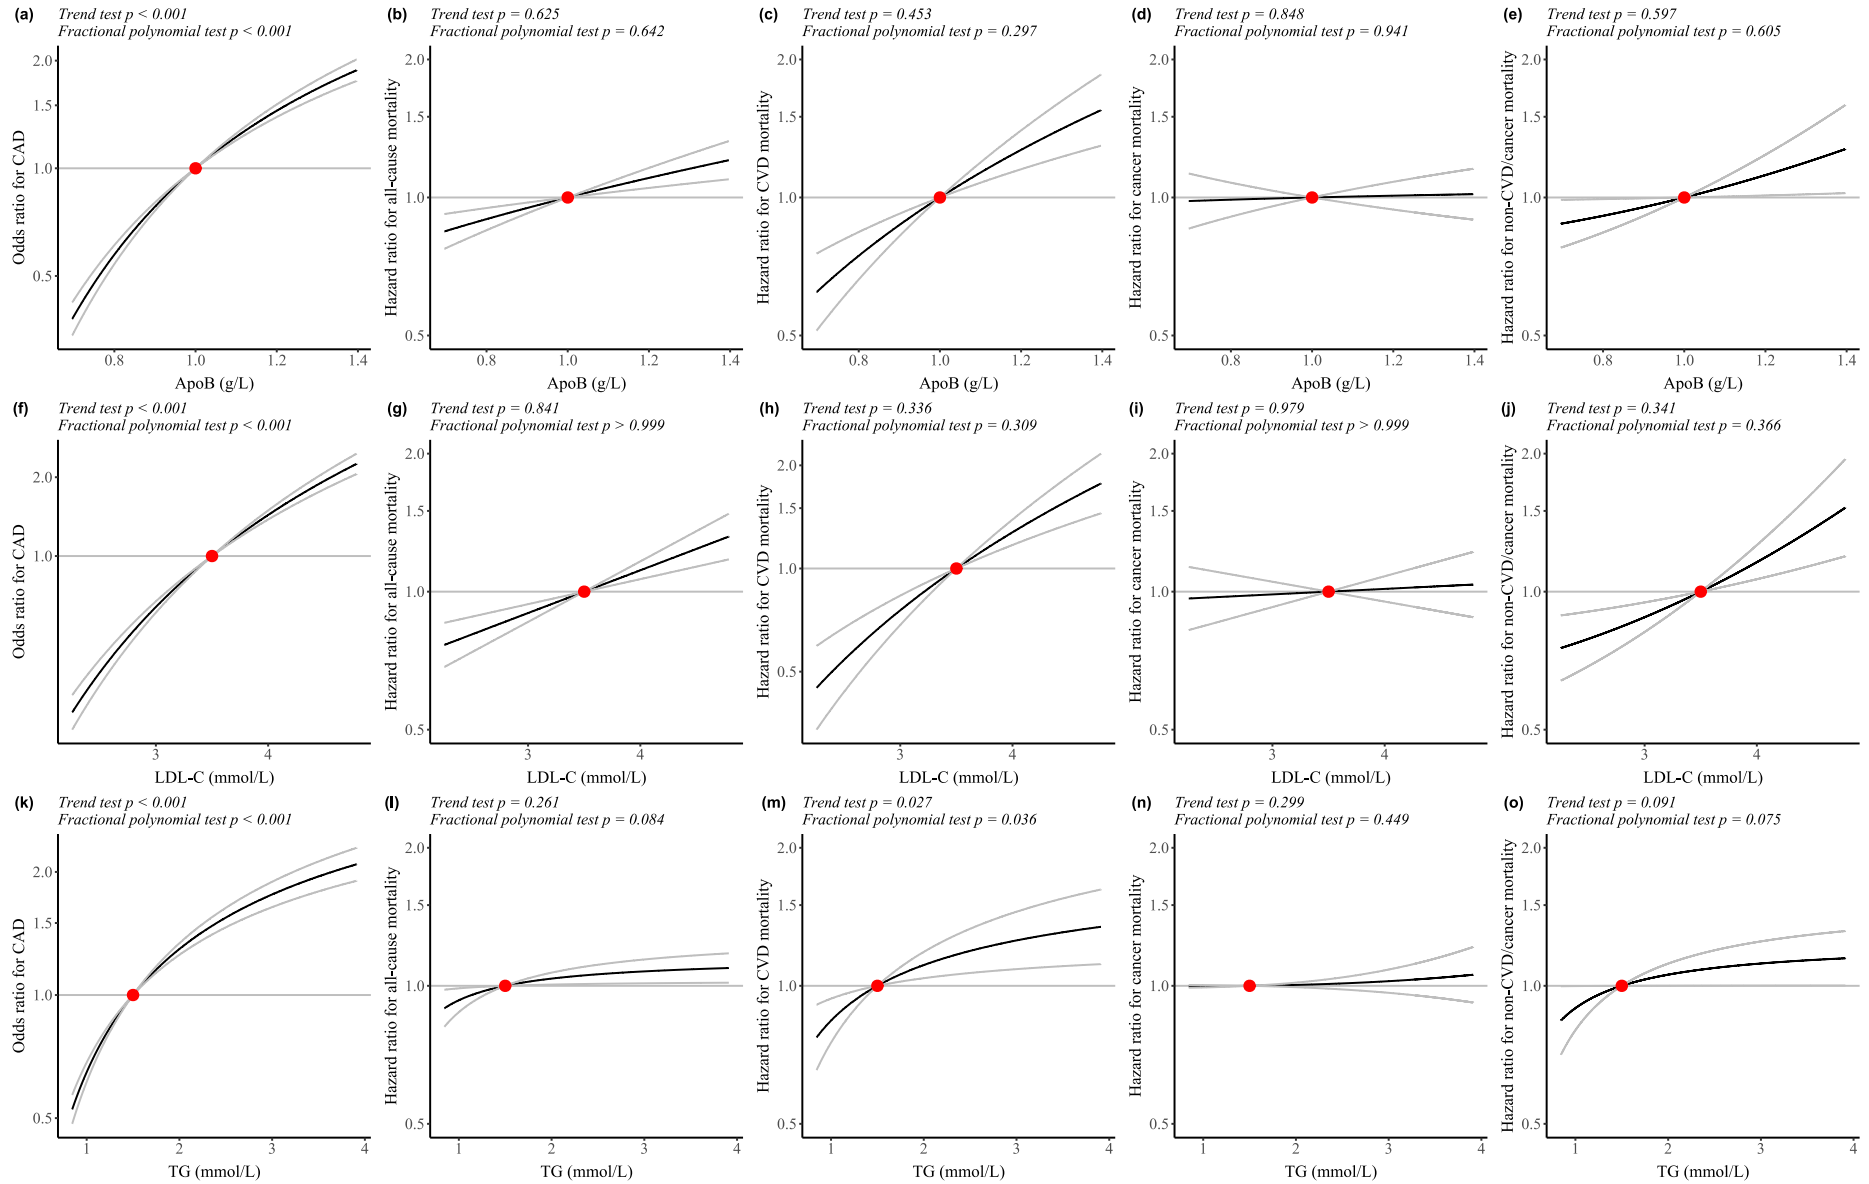

ApoB, apolipoprotein B; CAD, coronary artery disease; CVD, cardiovascular disease; LDL-C, low-density lipoprotein cholesterol; TG, triglycerides. The x-axis depicts apoB level in g/L, LDL-C level in mmol/L, or TG level in mmol/L. The y-axis depicts the odds ratio for CAD or hazard ratio for mortality outcomes with respect to the reference, plotted on a log scale. Reference is set to the median of each lipid trait (1.0 g/L for apoB, 3.5 mmol/L for LDL-C, and 1.5 mmol/L for TG). The black lines represent the dose-response relationship, and the grey lines represent the 95% confidence intervals. The trend test assesses whether a linear trend in the stratum-specific estimates exists, and the fractional polynomial test examines whether a non-linear model fits the exposure-outcome relationship better than a linear model.

**eFigure 3. Shapes of the Associations of Genetically-Predicted ApoB, LDL-C, and TG With CAD, All-Cause Mortality, and Cause-Specific Mortality for Females**

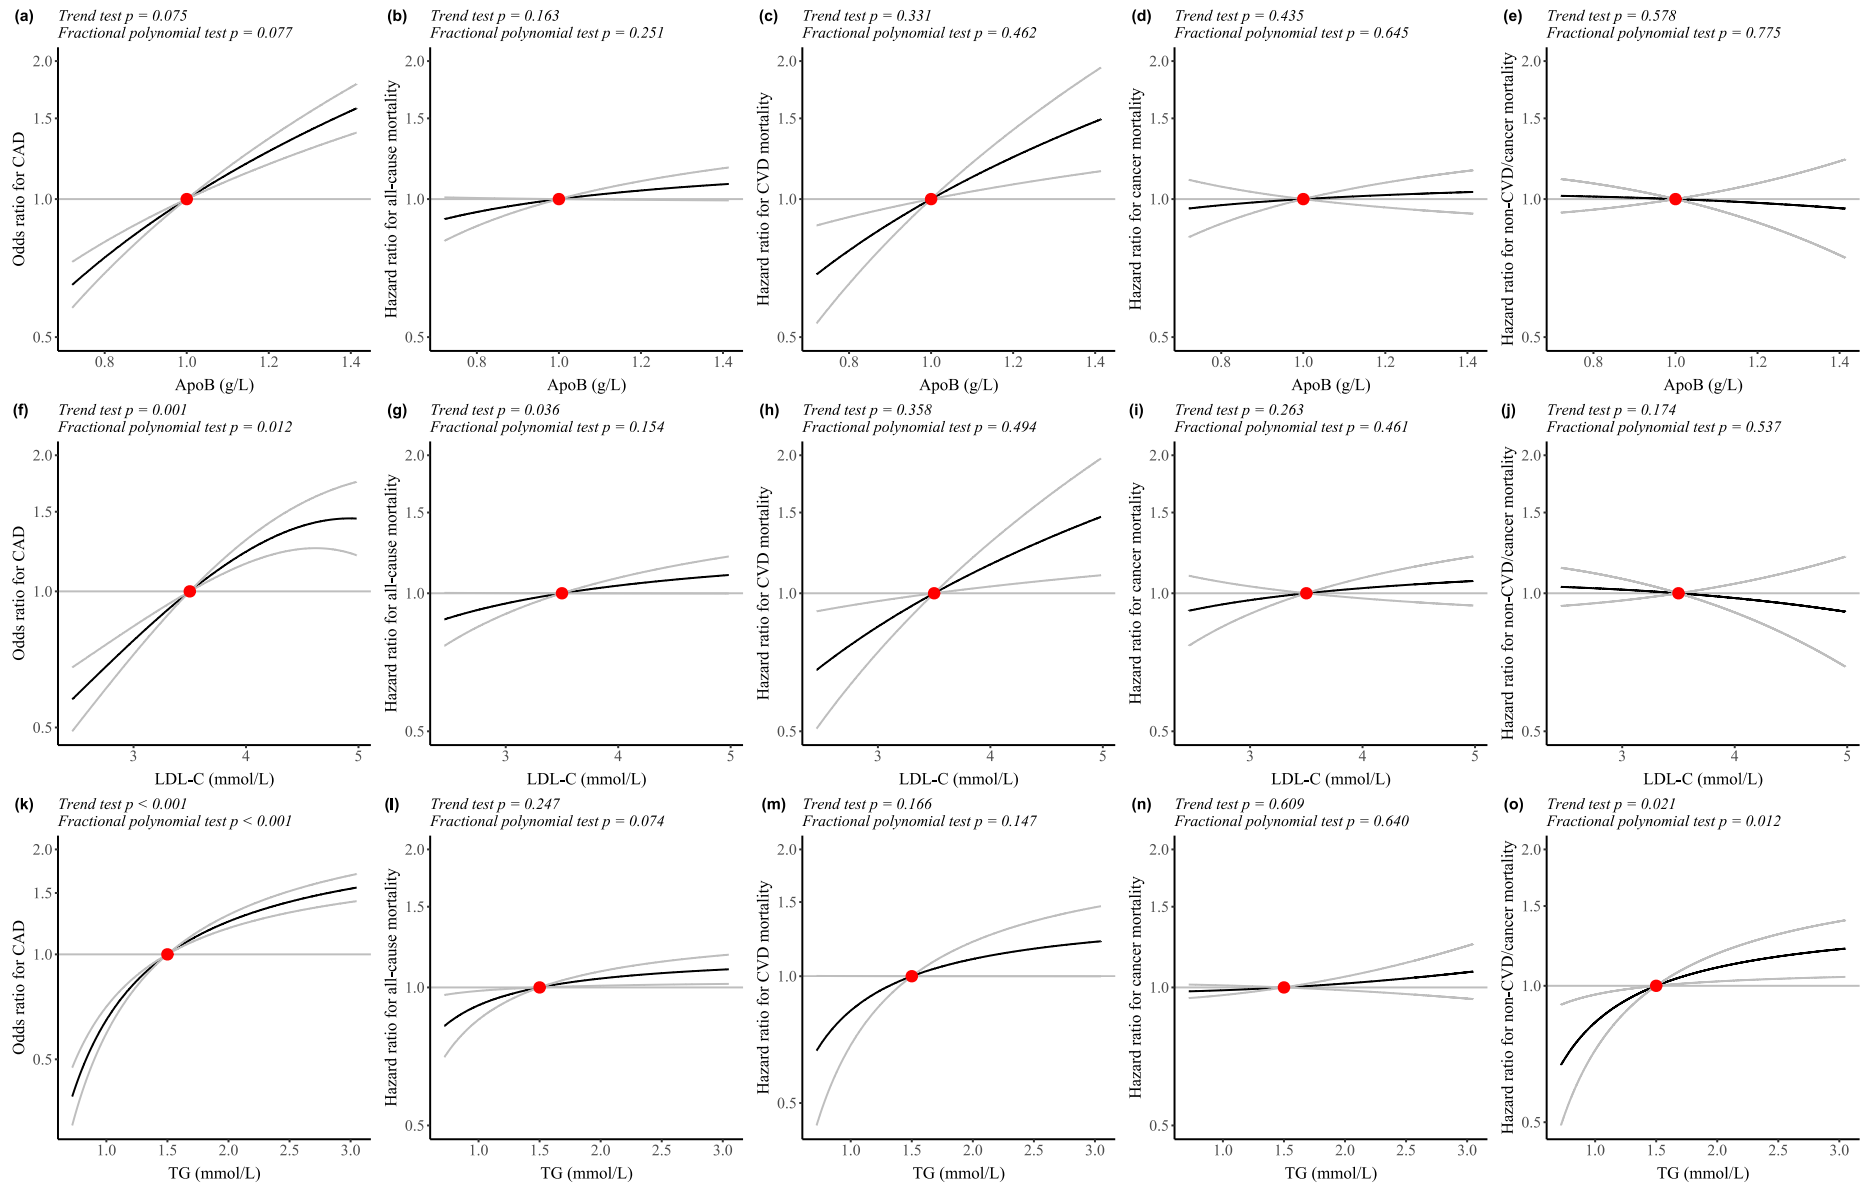

ApoB, apolipoprotein B; CAD, coronary artery disease; CVD, cardiovascular disease; LDL-C, low-density lipoprotein cholesterol; TG, triglycerides. The x-axis depicts apoB level in g/L, LDL-C level in mmol/L, or TG level in mmol/L. The y-axis depicts the odds ratio for CAD or hazard ratio for mortality outcomes with respect to the reference, plotted on a log scale. Reference is set to the median of each lipid trait (1.0 g/L for apoB, 3.5 mmol/L for LDL-C, and 1.5 mmol/L for TG). The black lines represent the dose-response relationship, and the grey lines represent the 95% confidence intervals. The trend test assesses whether a linear trend in the stratum-specific estimates exists, and the fractional polynomial test examines whether a non-linear model fits the exposure-outcome relationship better than a linear model.

**eFigure 4. Shapes of the Associations of Genetically-Predicted ApoB, LDL-C, and TG With CAD, All-Cause Mortality, and Cause-Specific Mortality for Younger People**

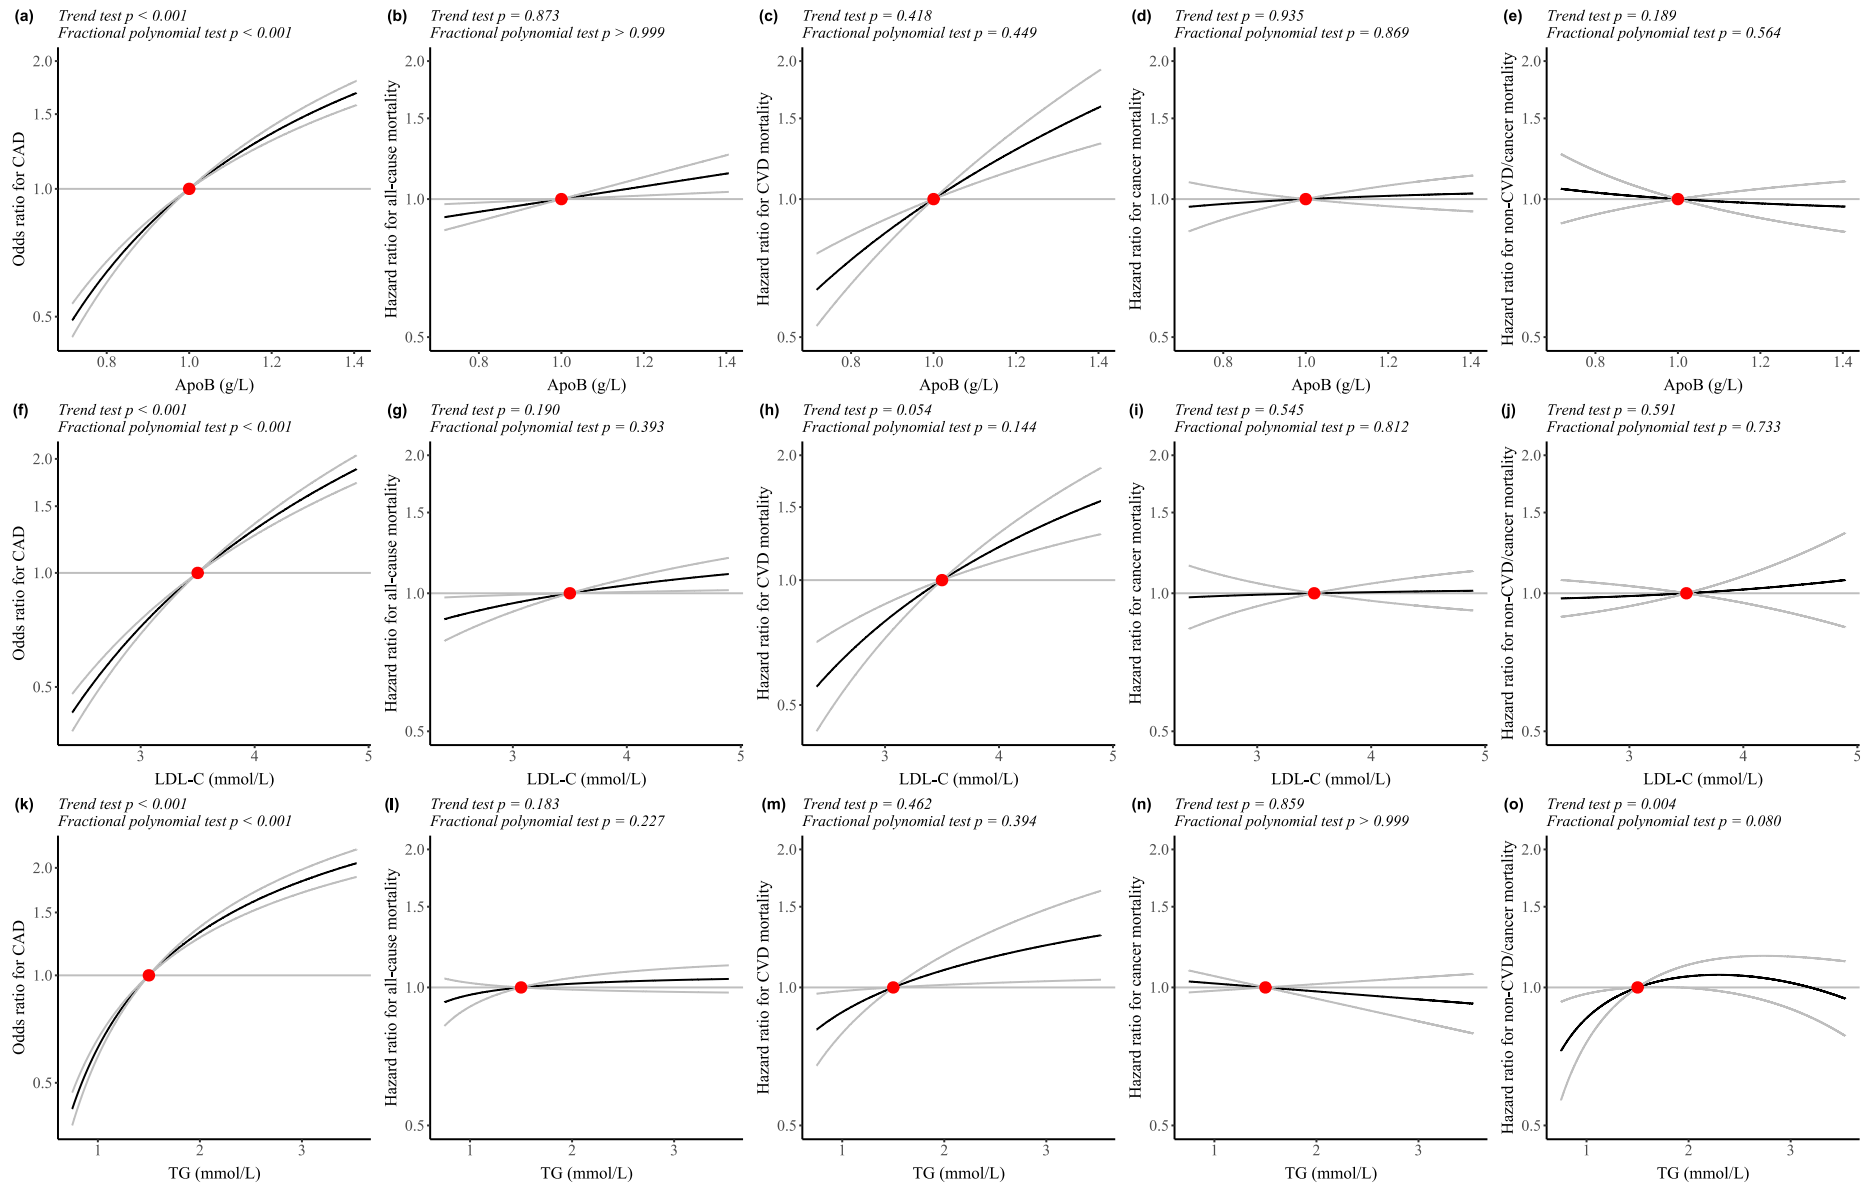

ApoB, apolipoprotein B; CAD, coronary artery disease; CVD, cardiovascular disease; LDL-C, low-density lipoprotein cholesterol; TG, triglycerides. The x-axis depicts apoB level in g/L, LDL-C level in mmol/L, or TG level in mmol/L. The y-axis depicts the odds ratio for CAD or hazard ratio for mortality outcomes with respect to the reference, plotted on a log scale. Reference is set to the median of each lipid trait (1.0 g/L for apoB, 3.5 mmol/L for LDL-C, and 1.5 mmol/L for TG). The black lines represent the dose-response relationship, and the grey lines represent the 95% confidence intervals. The trend test assesses whether a linear trend in the stratum-specific estimates exists, and the fractional polynomial test examines whether a non-linear model fits the exposure-outcome relationship better than a linear model.



**Figure 5. Shapes of the Associations of Genetically-Predicted ApoB, LDL-C, and TG With CAD, All-Cause Mortality, and Cause-Specific Mortality for Older People**

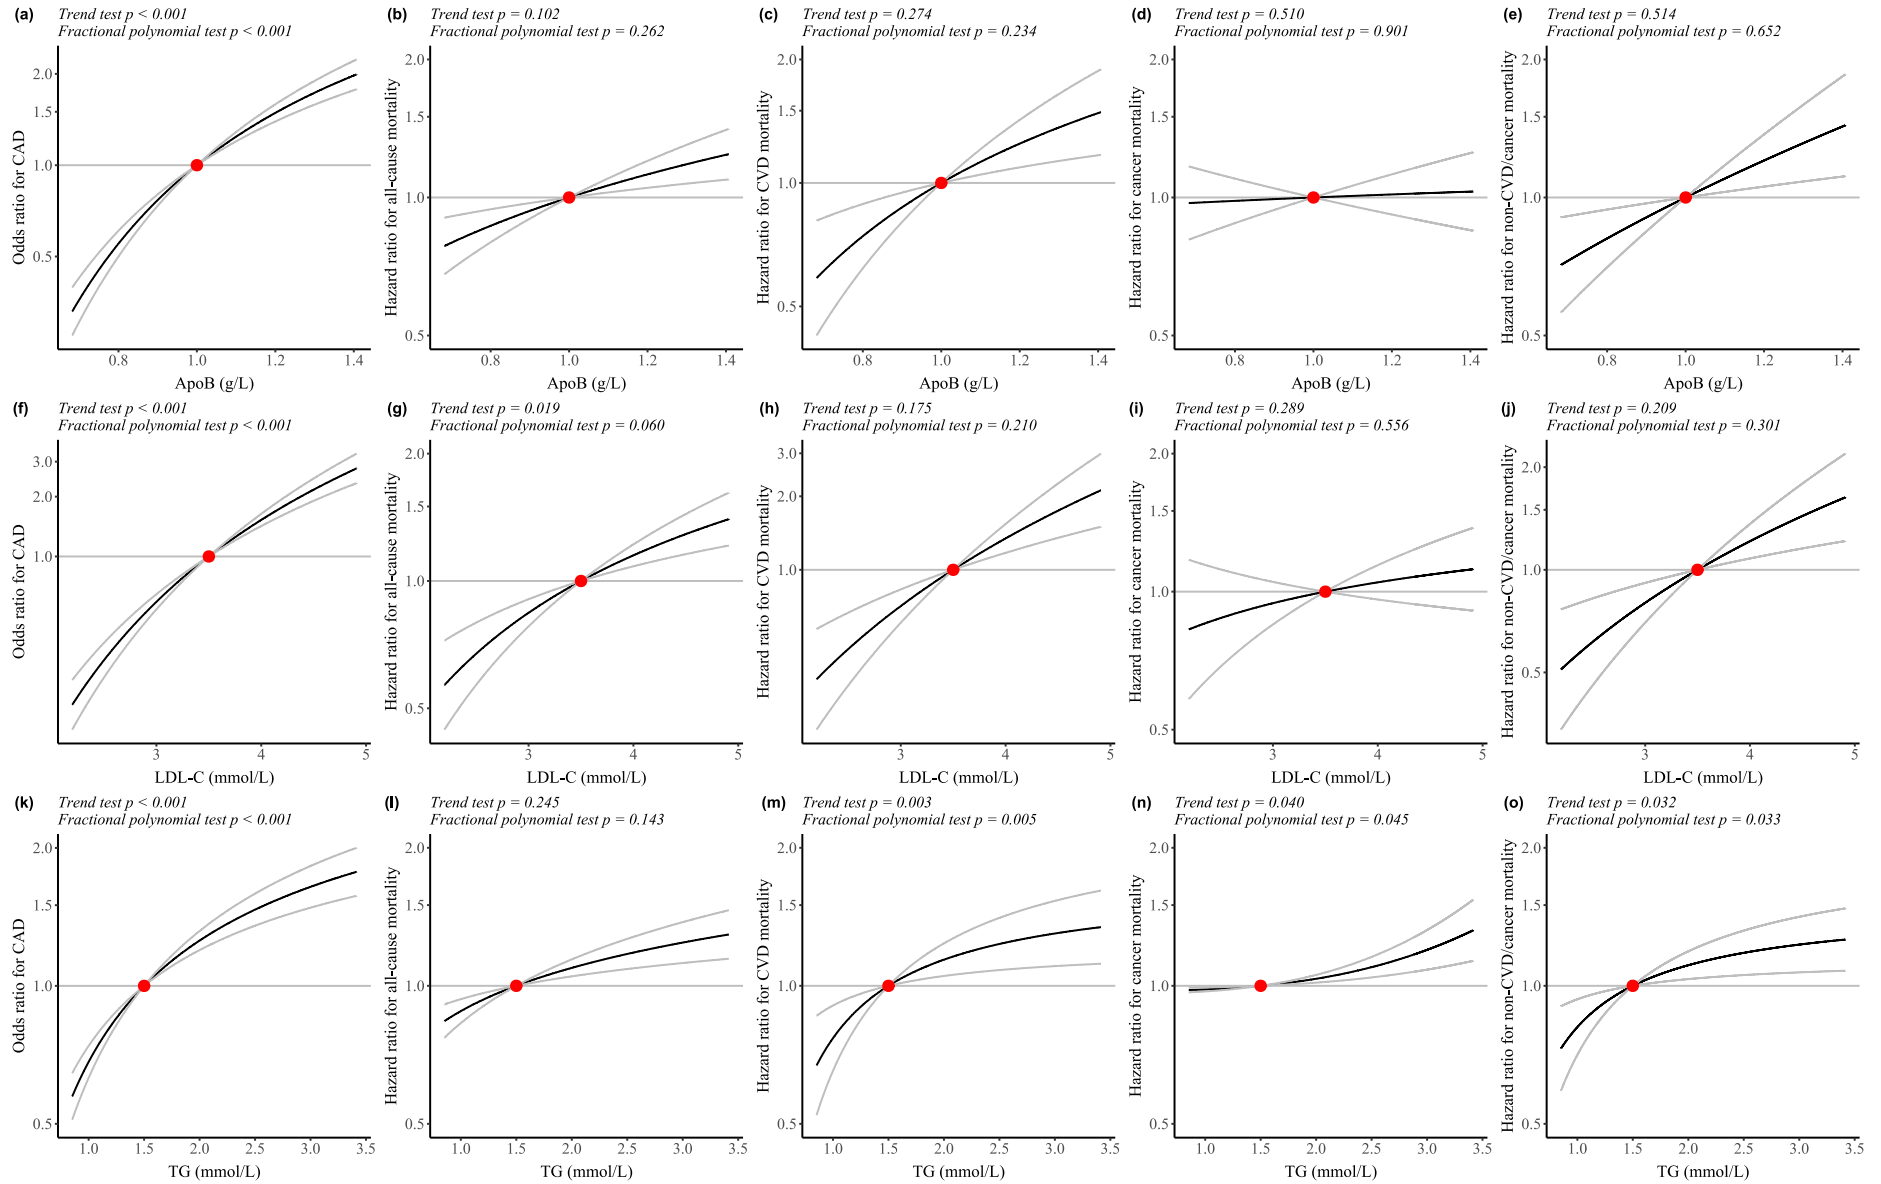

ApoB, apolipoprotein B; CAD, coronary artery disease; CVD, cardiovascular disease; LDL-C, low-density lipoprotein cholesterol; TG, triglycerides. The x-axis depicts apoB level in g/L, LDL-C level in mmol/L, or TG level in mmol/L. The y-axis depicts the odds ratio for CAD or hazard ratio for mortality outcomes with respect to the reference, plotted on a log scale. Reference is set to the median of each lipid trait (1.0 g/L for apoB, 3.5 mmol/L for LDL-C, and 1.5 mmol/L for TG). The black lines represent the dose-response relationship, and the grey lines represent the 95% confidence intervals. The trend test assesses whether a linear trend in the stratum-specific estimates exists, and the fractional polynomial test examines whether a non-linear model fits the exposure-outcome relationship better than a linear model.
