# Supplementary material for: Dose-Response Associations of Lipid Traits With Coronary Artery Disease and Mortality
Source: PubMed Central journal article supplement (PMC10799266; doi:10.1001/jamanetworkopen.2023.52572), 2024-01-19
Supplement: jamanetwopen-e2352572-s002.pdf [file jamanetwopen-e2352572-s002.pdf]

## Data Sharing Statement

Yang. Dose-Response Associations of Lipid Traits With Coronary Artery Disease and Mortality. *JAMA Netw Open*. Published January 19, 2024. doi:10.1001/jamanetworkopen.2023.52572

### Data

**Data available:** No

### Additional Information

**Explanation for why data not available:** Data from UK Biobank are available to any bona fide scientific research on application. We do not own UK Biobank data, and so we cannot release these data into the public domain ourselves.
